# Supplementary material for: Multi-scenario surveillance of respiratory viruses in aerosols with a sub-single molecule spatial resolution
Source: Research Square preprint supplement (doi:10.21203/rs.3.rs-4161341/v1), 2024-03-29
Supplement: Supplementary file 1 [file Source Data Fig.2.xlsx]

## Sheet: Sheet1
Fig. 2b
Virus input（copie/mL）	Ct Value-SARS-COV-2			Ct Value-Influenza A			Ct Value-Influenza B			Ct Value-RSV
5	ND	ND	ND	26.6156	27.9004	26.8073	33.3337	33.6031	33.3332	31.8331	33.2331	31.2987
10	35.2721	35.1562	35.0404	26.2006	26.6189	26.4934	32.8365	32.6337	32.8342	31.7261	31.9215	31.8197
20	36.9406	36.4761	35.7822	24.4303	24.5989	24.5508	31.9183	31.6085	31.8961	31.4176	30.4133	30.7103
50	34.8112	33.0363	34.2497	22.3426	23.8121	23.2114	30.2147	30.4655	30.223	30.9863	30.3992	29.4553
100	35.5876	32.677	33.8454	22.68	21.4284	21.673	29.188	28.7194	28.9624	26.4427	26.6791	27.4105
200	33.4746	33.6126	33.2259	21.3805	22.3807	21.9521	28.6425	28.6979	28.5147	28.3406	28.7503	28.4463
1000	31.8224	31.1595	31.5028	21.3296	21.1832	21.6531	28.2654	28.0232	28.4301	27.1201	26.7723	27.5322
Fig. 2d
Ct Value-SARS-COV-2							Ct Value-Influenza A							Ct Value-Influenza B							Ct Value-RSV
ND	30.7559	31.3814	36.9254	31.3604	ND		23.2545	21.7708	22.464	ND	22.6784	ND		28.2882	27.5089	ND	29.6068	28.1398	ND		29.7272	ND	28.6786	32.005	30.0138	ND
ND	30.3852	30.9708	31.9725	31.8023	ND		23.2547	20.9859	22.5819	ND	22.5786	ND		26.93	26.9807	ND	28.2096	27.8097	ND		26.8011	ND	28.6273	29.6944	29.968	ND
ND	31.4316	31.3448	31.5174	31.8751	ND		22.8279	21.9274	22.6321	ND	22.5942	ND		27.6605	27.3664	ND	27.7944	27.7659	ND		29.3436	ND	28.6826	30.104	30.2033	ND
Fig. 2e
Virus input（copie/mL）	Ct Value-SARS-COV-2			Ct Value-Influenza A			Ct Value-Influenza B			Ct Value-RSV
10	44.5	38.65	37.26	29.93	29.98	29.56	31.68	32.3	31.11	32.9	32	30.81
20	44.49	34.49	32.34	28.4	29.05	28.79	29.6	30.4	30.83	30.38	29.96	30.37
50	34.87	35.38	40.89	28.04	27.99	27.63	32.07	31.36	31.36	29.5	30.54	29.92
100	34.14	33.68	36.34	23.96	25.51	24.9	27.47	28.27	27.64	27.16	28.3	27.27
200	32.28	32.63	33.53	24.19	24.1	23.79	27.36	26.55	26.73	27.24	27.48	27.77
1000	31.54	30.58	31.21	22.94	22.45	24.58	27.15	26.95	26.6	26.16	26.13	25.51
Fig. 2f
Virus input（copie/mL）	Ct Value
20	39	39	40
50	39	38.5	38
100	37	37.5	37.5
200	37.5	37	36.5
