# Supplementary material for: Multi-scenario surveillance of respiratory viruses in aerosols with a sub-single molecule spatial resolution
Source: Research Square preprint supplement (doi:10.21203/rs.3.rs-4161341/v1), 2024-03-29
Supplement: Supplementary file 5 [file Source Data Fig.3.xlsx]

## Sheet: Sheet1
Fig. 2b/2c
Sample ID	Ct Value-public toilets	Ct Value-Office place	Ct Value-Interior corridor	Ct Value-Parking lots①	Ct Value-Parking lots②
1	40	34	40	ND	37
2	34	37	34	38	37
3	36	36	36	39	38
4	34	38	34	37	36
5	37	35	37	35	38
6	36	38	36	36	36
7	38	39	38	38	36
8	37	38	37	ND	36
Fig. 2e
Sample ID	Before ventilation	After ventilation
1	33.77	35.53
2	35.95	ND
3	33.75	ND
4	34.3	ND
Fig. 2f/2g
Sample type	Aerosol samples	Bedside table	The patient collar	The bedding	The patient skin	The medical monitor	The pager
Sampling time	The first round of sampling--Ward 1 -Day 1
0h	32.77	ND	ND	34.61	ND	36.86	ND
1h	35.09	ND	ND	ND	ND	ND	36.ND
2h	31.97	36.65	ND	ND	ND	36.23	33.2
3h	36.33	34.76	ND	ND	ND	32.84	32.96
4h	33.88	ND	ND	ND	ND	30.76	36.39
Number of positive samples	5	2	0	1	0	4	4
Positive detection rates	1	0.4	0	0.2	0	0.8	0.8
1-Positive detection rates	0	0.6	1	0.8	1	0.2	0.2
Sampling time	The second round of sampling--Ward 1-Day 3
0h	29.75	ND	36.95	ND	ND	ND	36.98
1h	ND	ND	ND	ND	35.85	ND	ND
2h	ND	33.79	ND	ND	ND	35.13	ND
3h	ND	ND	35.53	ND	ND	ND	36.14
4h	ND	ND	36.2	35.28	ND	ND	ND
Number of positive samples	1	1	3	1	1	1	2
Positive detection rates	0.2	0.2	0.6	0.2	0.2	0.2	0.4
1-Positive detection rates	0.8	0.8	0.4	0.8	0.8	0.8	0.6
Sampling time	The third round of sampling (Ward with severe COVID-19 patient)-Ward 2
0h	ND	ND	35.64	ND	ND	30.81	ND
1h	ND	ND	ND	36.68	ND	ND	ND
2h	ND	32.23	34.5	ND	ND	33.01	ND
3h	ND	36.68	35.34	ND	ND	ND	37.79
4h	32.71	ND	37.09	37.83	35.09	ND	32.62
Number of positive samples	1	2	4	2	1	2	2
Positive detection rates	0.2	0.4	0.8	0.4	0.2	0.4	0.4
1-Positive detection rates	0.8	0.6	0.2	0.6	0.8	0.6	0.6
Sampling time	The fourth round of sampling (Ward with mild COVID-19 patient)-Ward 3
0h	33.95	35.02	ND	ND	ND	ND	ND
1h	30.85	34.04	33.4	ND	ND	ND	34.72
2h	31.94	ND	ND	30.43	ND	ND	ND
3h	32.76	ND	34.65	ND	ND	35.68	ND
4h	34.02	ND	35.94	36	ND	34.38	34.51
Number of positive samples	5	2	3	2	0	2	2
Positive detection rates	1	0.4	0.6	0.4	0	0.4	0.4
1-Positive detection rates	0	0.6	0.4	0.6	1	0.6	0.6
Sampling time	The fifth round of sampling (Ward with mild COVID-19 patient)-Ward 4
0h	32.72	34.04	ND	33.79	ND	ND	ND
1h	ND	34.76	ND	35.93	34.3	ND	35.33
2h	ND	34.47	ND	36.36	ND	ND	33.55
3h	ND	34.11	34.5	32.75	33.83	ND	ND
4h	ND	ND	ND	ND	ND	34.68	ND
Number of positive samples	1	4	1	4	2	1	2
Positive detection rates	0.2	0.8	0.2	0.8	0.4	0.2	0.4
1-Positive detection rates	0.8	0.2	0.8	0.2	0.6	0.8	0.6
Sampling time	The sixth round of sampling (Ward with severe COVID-19 patient)-Ward 5
0h	31.6	ND	34.66	ND	37.98	34.65	ND
1h	33.67	ND	35.45	35.45	ND	34.95	ND
2h	36.77	ND	38.2	ND	ND	38.03	36.78
3h	37.73	36.45	ND	37.38	ND	38.35	ND
4h	33.68	ND	ND	ND	ND	36.58	ND
Number of positive samples	5	1	3	2	1	5	1
Positive detection rates	1	0.2	0.6	0.4	0.2	1	0.2
1-Positive detection rates	0	0.8	0.4	0.6	0.8	0	0.8
