# Supplementary material for: Multi-scenario surveillance of respiratory viruses in aerosols with a sub-single molecule spatial resolution
Source: Research Square preprint supplement (doi:10.21203/rs.3.rs-4161341/v1), 2024-03-29
Supplement: Supplementary file 9 [file Source Data Fig.4.xlsx]

## Sheet: Sheet1
Fig. 4e
	Ct value-200copies/mL			Ct value-50copies/mL
PC	34	34	34	36	40	37
Treated	33	35	33	38	35	37
