# Supplementary material for: Multi-scenario surveillance of respiratory viruses in aerosols with a sub-single molecule spatial resolution
Source: Research Square preprint supplement (doi:10.21203/rs.3.rs-4161341/v1), 2024-03-29
Supplement: Supplementary file 13 [file Source Data Fig.5.xlsx]

## Sheet: Sheet1
Fig. 5b
Virus input（copie/mL）	Ct Value
100	34	36	36
500	34	35	36
1000	34	34	33
5000	32	32	32
10000	31	31	32
Fig. 5c
1000 copies/mL	PC	34	34	33
	medical masks	37	40	38
	N95 respirators	ND	35	ND
10000 copies/mL	PC	31	31	32
	medical masks	36	34	35
	N95 respirators	38	39	38
Fig. 5d
	Ct Value
Monitoring time	Day1	Day2	Day3	Day4	Day5	Day6
10:00:00	ND	30	ND	28	28	32
11:00:00	33	ND	28	28	32	ND
12:00:00	34	ND	ND	ND	34	ND
13:00:00	31	28	30	29	ND	32
14:00:00	33	30	28	29	ND	ND
15:00:00	27	33	28	28	30	33
16:00:00	ND	29	29	28	31	ND
17:00:00	29	30	28	29	ND	32
Fig. 5e
Test date
Day 1	ND	32	37	35	ND	ND	39	ND	ND	ND
Day 4	ND	30	34	34	ND	32	32	ND	32	35
Fig. 5f
	Ward 1		Ward 2		Ward 3		Ward 4		Ward 5
Ct Value	31.25	33.59	33.37	31.69	29.ND	32.16	28.21	34.01	34.3	31.12
