# Supplementary material for: Multi-scenario surveillance of respiratory viruses in aerosols with a sub-single molecule spatial resolution
Source: Research Square preprint supplement (doi:10.21203/rs.3.rs-4161341/v1), 2024-03-29
Supplement: Supplementary file 17 [file Source Data Supplementary Figures.xlsx]

## Sheet: Sheet1
Supplementary Fig. 3c
Aerodynamic particle size (μm)	Physical collection efficiency
0.5	27.02
0.8	54.32
1	71.38
1.28	83.1
2	97.32
4	99
Supplementary Fig. 6d
Sample type	Ct Value
Environmental decontamination	ND	ND	ND
Enhanced indoor ventilation	ND	38	ND
